# Supplementary material for: Pan-Genome Analysis Links the Hereditary Variation of Leptospirillum ferriphilum With Its Evolutionary Adaptation
Source: Front Microbiol. 2018 Mar 27;9:577. doi: 10.3389/fmicb.2018.00577 (PMC5880901; doi:10.3389/fmicb.2018.00577)
Supplement: Supplementary file 2 [file Data_Sheet_2.xlsx]

## Sheet: Sheet1
TABLE S5 Putative genomic islands potentially present in Leptospirillum ferriphilum strains.
GI Number*	Island start	Island end	Length	Gene start	Gene end	Product
DX
GI1	Contig30: 105966	Contig30: 114426	8461	Contig30: 105966	Contig30: 108329	DNA topoisomerase I
GI1	Contig30: 105966	Contig30: 114426	8461	Contig30: 108310	Contig30: 109707	methylenetetrahydrofolate--tRNA-(uracil(54)- C(5))-methyltransferase (FADH(2)-oxidizing) TrmFO
GI1	Contig30: 105966	Contig30: 114426	8461	Contig30: 109751	Contig30: 110665	hypothetical protein
GI1	Contig30: 105966	Contig30: 114426	8461	Contig30: 110649	Contig30: 111245	HslU--HslV peptidase proteolytic subunit
GI1	Contig30: 105966	Contig30: 114426	8461	Contig30: 111242	Contig30: 112576	HslU--HslV peptidase ATPase subunit
GI1	Contig30: 105966	Contig30: 114426	8461	Contig30: 112630	Contig30: 113502	acetylglutamate kinase
GI1	Contig30: 105966	Contig30: 114426	8461	Contig30: 113489	Contig30: 113959	hypothetical protein
GI1	Contig30: 105966	Contig30: 114426	8461	Contig30: 113983	Contig30: 114426	deoxyuridine 5'-triphosphate nucleotidohydrolase
GI2	Contig1: 156	Contig1: 12787	12632	Contig1: 156	Contig1: 548	hypothetical protein
GI2	Contig1: 156	Contig1: 12787	12632	Contig1: 523	Contig1: 843	transcriptional regulator
GI2	Contig1: 156	Contig1: 12787	12632	Contig1: 1127	Contig1: 2848	IS4 family transposase
GI2	Contig1: 156	Contig1: 12787	12632	Contig1: 3036	Contig1: 3311	hypothetical protein
GI2	Contig1: 156	Contig1: 12787	12632	Contig1: 3661	Contig1: 3840	hypothetical protein
GI2	Contig1: 156	Contig1: 12787	12632	Contig1: 4995	Contig1: 6491	cytochrome
GI2	Contig1: 156	Contig1: 12787	12632	Contig1: 6699	Contig1: 7466	hypothetical protein
GI2	Contig1: 156	Contig1: 12787	12632	Contig1: 7715	Contig1: 8293	hypothetical protein
GI2	Contig1: 156	Contig1: 12787	12632	Contig1: 8321	Contig1: 9583	hypothetical protein
GI2	Contig1: 156	Contig1: 12787	12632	Contig1: 9644	Contig1: 9856	hypothetical protein
GI2	Contig1: 156	Contig1: 12787	12632	Contig1: 9932	Contig1: 10621	oxidoreductase
GI2	Contig1: 156	Contig1: 12787	12632	Contig1: 10749	Contig1: 10970	hypothetical protein
GI2	Contig1: 156	Contig1: 12787	12632	Contig1: 10930	Contig1: 11361	putative toxin-antitoxin system toxin component, PIN family
GI2	Contig1: 156	Contig1: 12787	12632	Contig1: 11368	Contig1: 11661	prevent-host-death protein
GI2	Contig1: 156	Contig1: 12787	12632	Contig1: 11826	Contig1: 12155	hypothetical protein
GI2	Contig1: 156	Contig1: 12787	12632	Contig1: 12216	Contig1: 12593	VapC toxin family PIN domain ribonuclease
GI2	Contig1: 156	Contig1: 12787	12632	Contig1: 12590	Contig1: 12787	DUF2191 domain-containing protein
GI3	Contig11: 2204	Contig11: 12398	10195	Contig11: 2204	Contig11: 3229	integrase
GI3	Contig11: 2204	Contig11: 12398	10195	Contig11: 3226	Contig11: 4200	hypothetical protein
GI3	Contig11: 2204	Contig11: 12398	10195	Contig11: 4463	Contig11: 4804	addiction module protein
GI3	Contig11: 2204	Contig11: 12398	10195	Contig11: 4807	Contig11: 5127	transcriptional regulator
GI3	Contig11: 2204	Contig11: 12398	10195	Contig11: 5239	Contig11: 5469	hypothetical protein
GI3	Contig11: 2204	Contig11: 12398	10195	Contig11: 6048	Contig11: 6353	transcriptional regulator
GI3	Contig11: 2204	Contig11: 12398	10195	Contig11: 7239	Contig11: 7613	hypothetical protein
GI3	Contig11: 2204	Contig11: 12398	10195	Contig11: 7729	Contig11: 8874	hypothetical protein
GI3	Contig11: 2204	Contig11: 12398	10195	Contig11: 8871	Contig11: 9134	hypothetical protein
GI3	Contig11: 2204	Contig11: 12398	10195	Contig11: 9367	Contig11: 10110	calcineurin-like phosphoesterase
GI3	Contig11: 2204	Contig11: 12398	10195	Contig11: 10110	Contig11: 10877	hypothetical protein
GI3	Contig11: 2204	Contig11: 12398	10195	Contig11: 11131	Contig11: 11982	hypothetical protein
GI3	Contig11: 2204	Contig11: 12398	10195	Contig11: 11976	Contig11: 12398	hypothetical protein
GI4	Contig7: 22883	Contig7: 30297	7415	Contig7: 22883	Contig7: 23074	hypothetical protein
GI4	Contig7: 22883	Contig7: 30297	7415	Contig7: 23275	Contig7: 25116	pyridine nucleotide-disulfide oxidoreductase
GI4	Contig7: 22883	Contig7: 30297	7415	Contig7: 25113	Contig7: 25733	rieske iron-sulfur family protein
GI4	Contig7: 22883	Contig7: 30297	7415	Contig7: 25909	Contig7: 26670	cytochrome b/b6 domain-containing protein
GI4	Contig7: 22883	Contig7: 30297	7415	Contig7: 26793	Contig7: 27554	cytochrome B6
GI4	Contig7: 22883	Contig7: 30297	7415	Contig7: 27653	Contig7: 27871	hypothetical protein
GI4	Contig7: 22883	Contig7: 30297	7415	Contig7: 27868	Contig7: 28833	cytochrome c, class I
GI4	Contig7: 22883	Contig7: 30297	7415	Contig7: 28801	Contig7: 28983	hypothetical protein
GI4	Contig7: 22883	Contig7: 30297	7415	Contig7: 29218	Contig7: 30297	IS630 family transposase
ZJ
GI1	Contig5: 105940	Contig5: 116233	10294	Contig5: 105940	Contig5: 108303	DNA topoisomerase I
GI1	Contig5: 105940	Contig5: 116233	10294	Contig5: 108284	Contig5: 109681	methylenetetrahydrofolate--tRNA-(uracil(54)- C(5))-methyltransferase (FADH(2)-oxidizing) TrmFO
GI1	Contig5: 105940	Contig5: 116233	10294	Contig5: 109725	Contig5: 110639	hypothetical protein
GI1	Contig5: 105940	Contig5: 116233	10294	Contig5: 110623	Contig5: 111219	HslU--HslV peptidase proteolytic subunit
GI1	Contig5: 105940	Contig5: 116233	10294	Contig5: 111216	Contig5: 112550	HslU--HslV peptidase ATPase subunit
GI1	Contig5: 105940	Contig5: 116233	10294	Contig5: 112604	Contig5: 113476	acetylglutamate kinase
GI1	Contig5: 105940	Contig5: 116233	10294	Contig5: 113463	Contig5: 113933	hypothetical protein
GI1	Contig5: 105940	Contig5: 116233	10294	Contig5: 113957	Contig5: 114400	deoxyuridine 5'-triphosphate nucleotidohydrolase
GI1	Contig5: 105940	Contig5: 116233	10294	Contig5: 114535	Contig5: 115380	16S rRNA (cytidine(1402)-2'-O)-methyltransferase
GI1	Contig5: 105940	Contig5: 116233	10294	Contig5: 115373	Contig5: 116233	pantoate--beta-alanine ligase
GI2	Contig68: 284	Contig68: 9647	9364	Contig68: 284	Contig68: 499	hypothetical protein
GI2	Contig68: 284	Contig68: 9647	9364	Contig68: 867	Contig68: 1064	hypothetical protein
GI2	Contig68: 284	Contig68: 9647	9364	Contig68: 1061	Contig68: 1300	hypothetical protein
GI2	Contig68: 284	Contig68: 9647	9364	Contig68: 1297	Contig68: 1845	hypothetical protein
GI2	Contig68: 284	Contig68: 9647	9364	Contig68: 2145	Contig68: 3119	hypothetical protein
GI2	Contig68: 284	Contig68: 9647	9364	Contig68: 3466	Contig68: 5655	hypothetical protein
GI2	Contig68: 284	Contig68: 9647	9364	Contig68: 5652	Contig68: 6479	hypothetical protein
GI2	Contig68: 284	Contig68: 9647	9364	Contig68: 6483	Contig68: 7190	hypothetical protein
GI2	Contig68: 284	Contig68: 9647	9364	Contig68: 7205	Contig68: 7765	hypothetical protein
GI2	Contig68: 284	Contig68: 9647	9364	Contig68: 7927	Contig68: 8310	hypothetical protein
GI2	Contig68: 284	Contig68: 9647	9364	Contig68: 8496	Contig68: 9647	site-specific integrase
GI3	Contig10: 13092	Contig10: 21926	8835	Contig10: 13092	Contig10: 13310	hypothetical protein
GI3	Contig10: 13092	Contig10: 21926	8835	Contig10: 13612	Contig10: 13956	winged helix-turn-helix domain-containing protein
GI3	Contig10: 13092	Contig10: 21926	8835	Contig10: 13953	Contig10: 14240	hypothetical protein
GI3	Contig10: 13092	Contig10: 21926	8835	Contig10: 14737	Contig10: 15192	hypothetical protein
GI3	Contig10: 13092	Contig10: 21926	8835	Contig10: 15203	Contig10: 15472	hypothetical protein
GI3	Contig10: 13092	Contig10: 21926	8835	Contig10: 15524	Contig10: 15889	hypothetical protein
GI3	Contig10: 13092	Contig10: 21926	8835	Contig10: 16069	Contig10: 17262	hypothetical protein
GI3	Contig10: 13092	Contig10: 21926	8835	Contig10: 17252	Contig10: 17983	AAA family ATPase
GI3	Contig10: 13092	Contig10: 21926	8835	Contig10: 17977	Contig10: 19554	hypothetical protein
GI3	Contig10: 13092	Contig10: 21926	8835	Contig10: 19905	Contig10: 21926	hypothetical protein
ML-04
GI1	262501	268617	6117	260199	262520	DNA topoisomerase I
GI1	262501	268617	6117	262501	263898	glucose-inhibited division protein A
GI1	262501	268617	6117	263888	264856	phage integrase family protein
GI1	262501	268617	6117	264840	265436	ATP-dependent protease subunit HslV
GI1	262501	268617	6117	265433	266767	ATP-dependent protease ATP-binding subunit HslU
GI1	262501	268617	6117	266821	267693	acetylglutamate kinase
GI1	262501	268617	6117	267680	268150	hypothetical protein
GI1	262501	268617	6117	268174	268617	deoxyuridine 5'-triphosphate nucleotidohydrolase
GI2	375463	382869	7407	375519	376622	integrase
GI2	375463	382869	7407	376624	377343	hypothetical protein
GI2	375463	382869	7407	377440	377667	hypothetical protein
GI2	375463	382869	7407	377784	378566	hypothetical protein
GI2	375463	382869	7407	378556	379515	replicative DNA helicase
GI2	375463	382869	7407	379720	379941	hypothetical protein
GI2	375463	382869	7407	379938	380840	hypothetical protein
GI2	375463	382869	7407	381228	381653	hypothetical protein
GI2	375463	382869	7407	381708	382055	hypothetical protein
GI2	375463	382869	7407	382068	382499	hypothetical protein
GI3	450087	479193	29107	450233	451300	integrase
GI3	450087	479193	29107	451308	452381	filamentation induced by cAMP protein fic
GI3	450087	479193	29107	452685	453356	hypothetical protein
GI3	450087	479193	29107	453513	454571	transposase
GI3	450087	479193	29107	454967	456184	transposase
GI3	450087	479193	29107	456508	458529	hypothetical protein
GI3	450087	479193	29107	458880	460457	hypothetical protein
GI3	450087	479193	29107	460451	461182	IstB-like ATP-binding protein
GI3	450087	479193	29107	461172	462365	hypothetical protein
GI3	450087	479193	29107	462545	462910	hypothetical protein
GI3	450087	479193	29107	462962	463231	hypothetical protein
GI3	450087	479193	29107	463242	463697	hypothetical protein
GI3	450087	479193	29107	464194	464481	hypothetical protein
GI3	450087	479193	29107	464478	464822	hypothetical protein
GI3	450087	479193	29107	465124	465381	hypothetical protein
GI3	450087	479193	29107	465413	465745	hypothetical protein
GI3	450087	479193	29107	465742	466278	hypothetical protein
GI3	450087	479193	29107	466313	466852	hypothetical protein
GI3	450087	479193	29107	466934	467773	hypothetical protein
GI3	450087	479193	29107	468123	468329	hypothetical protein
GI3	450087	479193	29107	468489	468776	hypothetical protein
GI3	450087	479193	29107	469126	469776	hypothetical protein
GI3	450087	479193	29107	469776	470669	restriction endonuclease
GI3	450087	479193	29107	470778	471437	type III restriction system methylase
GI3	450087	479193	29107	471424	472926	adenine-specific DNA-methyltransferase
GI3	450087	479193	29107	472930	475428	restriction enzyme
GI3	450087	479193	29107	475969	477159	hypothetical protein
GI3	450087	479193	29107	477173	479059	hypothetical protein
GI4	454967	483332	28366	454967	456184	transposase
GI4	454967	483332	28366	456508	458529	hypothetical protein
GI4	454967	483332	28366	458880	460457	hypothetical protein
GI4	454967	483332	28366	460451	461182	IstB-like ATP-binding protein
GI4	454967	483332	28366	461172	462365	hypothetical protein
GI4	454967	483332	28366	462545	462910	hypothetical protein
GI4	454967	483332	28366	462962	463231	hypothetical protein
GI4	454967	483332	28366	463242	463697	hypothetical protein
GI4	454967	483332	28366	464194	464481	hypothetical protein
GI4	454967	483332	28366	464478	464822	hypothetical protein
GI4	454967	483332	28366	465124	465381	hypothetical protein
GI4	454967	483332	28366	465413	465745	hypothetical protein
GI4	454967	483332	28366	465742	466278	hypothetical protein
GI4	454967	483332	28366	466313	466852	hypothetical protein
GI4	454967	483332	28366	466934	467773	hypothetical protein
GI4	454967	483332	28366	468123	468329	hypothetical protein
GI4	454967	483332	28366	468489	468776	hypothetical protein
GI4	454967	483332	28366	469126	469776	hypothetical protein
GI4	454967	483332	28366	469776	470669	restriction endonuclease
GI4	454967	483332	28366	470778	471437	type III restriction system methylase
GI4	454967	483332	28366	471424	472926	adenine-specific DNA-methyltransferase
GI4	454967	483332	28366	472930	475428	restriction enzyme
GI4	454967	483332	28366	475969	477159	hypothetical protein
GI4	454967	483332	28366	477173	479059	hypothetical protein
GI4	454967	483332	28366	480871	481167	hypothetical protein
GI4	454967	483332	28366	481223	481555	hypothetical protein
GI4	454967	483332	28366	481545	482058	hypothetical protein
GI4	454967	483332	28366	482235	483135	transposase
GI4	454967	483332	28366	483132	483332	hypothetical protein
GI5	520813	547371	26559	521433	524522	hypothetical protein
GI5	520813	547371	26559	524711	524971	hypothetical protein
GI5	520813	547371	26559	525243	525980	hypothetical protein
GI5	520813	547371	26559	525996	526700	hypothetical protein
GI5	520813	547371	26559	526697	526924	hypothetical protein
GI5	520813	547371	26559	527150	528208	transposase
GI5	520813	547371	26559	528604	529821	transposase
GI5	520813	547371	26559	529978	531123	transposase
GI5	520813	547371	26559	531864	532223	hypothetical protein
GI5	520813	547371	26559	532216	533646	plasmid coupling TrwB
GI5	520813	547371	26559	533709	533900	hypothetical protein
GI5	520813	547371	26559	533912	534403	hypothetical protein
GI5	520813	547371	26559	534598	536175	hypothetical protein
GI5	520813	547371	26559	536169	536900	IstB-like ATP-binding protein
GI5	520813	547371	26559	537122	539368	ATP-dependent exonuclease V subunit alpha
GI5	520813	547371	26559	539425	539628	hypothetical protein
GI5	520813	547371	26559	539642	539980	hypothetical protein
GI5	520813	547371	26559	539964	540179	hypothetical protein
GI5	520813	547371	26559	540349	541080	hypothetical protein
GI5	520813	547371	26559	541084	541734	hypothetical protein
GI5	520813	547371	26559	541745	542074	hypothetical protein
GI5	520813	547371	26559	542166	542450	hypothetical protein
GI5	520813	547371	26559	542447	542659	hypothetical protein
GI5	520813	547371	26559	542656	542898	hypothetical protein
GI5	520813	547371	26559	542991	543521	hypothetical protein
GI5	520813	547371	26559	543536	543781	hypothetical protein
GI5	520813	547371	26559	543778	544020	hypothetical protein
GI5	520813	547371	26559	544130	545068	hypothetical protein
GI5	520813	547371	26559	545061	545699	hypothetical protein
GI5	520813	547371	26559	545985	546191	hypothetical protein
GI5	520813	547371	26559	546188	547207	integrase
GI6	558715	640718	82004	558911	560011	hypothetical protein
GI6	558715	640718	82004	560222	560632	hypothetical protein
GI6	558715	640718	82004	560632	563985	hypothetical protein
GI6	558715	640718	82004	563982	564167	hypothetical protein
GI6	558715	640718	82004	564204	564617	hypothetical protein
GI6	558715	640718	82004	564630	565304	MobD mobilization protein
GI6	558715	640718	82004	565359	566027	hypothetical protein
GI6	558715	640718	82004	566012	566194	hypothetical protein
GI6	558715	640718	82004	566489	569386	conjugal transfer protein TraA
GI6	558715	640718	82004	569800	570006	hypothetical protein
GI6	558715	640718	82004	570365	570886	hypothetical protein
GI6	558715	640718	82004	570889	571245	hypothetical protein
GI6	558715	640718	82004	571269	571649	hypothetical protein
GI6	558715	640718	82004	571646	574846	hypothetical protein
GI6	558715	640718	82004	574843	576099	secretion protein HlyD
GI6	558715	640718	82004	576089	577516	outer membrane efflux protein
GI6	558715	640718	82004	577601	578038	hypothetical protein
GI6	558715	640718	82004	578570	578818	hypothetical protein
GI6	558715	640718	82004	578875	580185	transposase
GI6	558715	640718	82004	580370	581260	hypothetical protein
GI6	558715	640718	82004	581504	582820	MFS transporter
GI6	558715	640718	82004	582817	583176	transcriptional regulator
GI6	558715	640718	82004	583194	583949	MBL fold hydrolase
GI6	558715	640718	82004	584145	584669	redox protein, regulator of disulfide bond formation
GI6	558715	640718	82004	584712	585284	OsmC family protein
GI6	558715	640718	82004	585338	585823	hypothetical protein
GI6	558715	640718	82004	585947	586714	hypothetical protein
GI6	558715	640718	82004	586763	587023	hypothetical protein
GI6	558715	640718	82004	587020	588198	aminotransferase class V
GI6	558715	640718	82004	588198	588835	methyltransferase
GI6	558715	640718	82004	588903	589310	mercuric transporter MerT
GI6	558715	640718	82004	589310	590479	tetrahydromethanopterin S-methyltransferase subunit A
GI6	558715	640718	82004	590476	590883	transcriptional regulator
GI6	558715	640718	82004	591331	591708	hypothetical protein
GI6	558715	640718	82004	591686	591886	hypothetical protein
GI6	558715	640718	82004	592154	595345	chemiosmotic efflux protein CzcA
GI6	558715	640718	82004	595349	596269	hypothetical protein
GI6	558715	640718	82004	596328	597674	chemiosmotic efflux system C protein C
GI6	558715	640718	82004	597848	598255	hypothetical protein
GI6	558715	640718	82004	598417	598626	hypothetical protein
GI6	558715	640718	82004	598617	598847	hypothetical protein
GI6	558715	640718	82004	598848	599762	integrase
GI6	558715	640718	82004	600145	600483	hypothetical protein
GI6	558715	640718	82004	600703	600918	hypothetical protein
GI6	558715	640718	82004	600915	601214	hypothetical protein
GI6	558715	640718	82004	601216	601578	hypothetical protein
GI6	558715	640718	82004	601575	601802	hypothetical protein
GI6	558715	640718	82004	601894	602409	secretion activating protein
GI6	558715	640718	82004	602421	602630	hypothetical protein
GI6	558715	640718	82004	602630	603115	hypothetical protein
GI6	558715	640718	82004	603138	603407	hypothetical protein
GI6	558715	640718	82004	603475	604005	hypothetical protein
GI6	558715	640718	82004	604022	605071	hypothetical protein
GI6	558715	640718	82004	605080	605745	hypothetical protein
GI6	558715	640718	82004	605749	606837	baseplate J family protein
GI6	558715	640718	82004	606834	607211	hypothetical protein
GI6	558715	640718	82004	607211	607888	hypothetical protein
GI6	558715	640718	82004	607891	609069	hypothetical protein
GI6	558715	640718	82004	609066	610310	hypothetical protein
GI6	558715	640718	82004	610314	612077	hypothetical protein
GI6	558715	640718	82004	612061	612510	hypothetical protein
GI6	558715	640718	82004	612659	613030	hypothetical protein
GI6	558715	640718	82004	613034	613465	hypothetical protein
GI6	558715	640718	82004	613482	615002	hypothetical protein
GI6	558715	640718	82004	615062	615874	hypothetical protein
GI6	558715	640718	82004	615883	616539	hypothetical protein
GI6	558715	640718	82004	616544	616750	hypothetical protein
GI6	558715	640718	82004	616752	617201	hypothetical protein
GI6	558715	640718	82004	617201	617641	hypothetical protein
GI6	558715	640718	82004	617631	617966	hypothetical protein
GI6	558715	640718	82004	617979	619448	hypothetical protein
GI6	558715	640718	82004	619582	620121	hypothetical protein
GI6	558715	640718	82004	620066	621550	hypothetical protein
GI6	558715	640718	82004	621690	622184	hypothetical protein
GI6	558715	640718	82004	622181	622468	hypothetical protein
GI6	558715	640718	82004	622470	623726	hypothetical protein
GI6	558715	640718	82004	623710	624252	phage terminase small subuni
GI6	558715	640718	82004	624249	624458	hypothetical protein
GI6	558715	640718	82004	624469	625773	deoxyribonuclease
GI6	558715	640718	82004	626026	627972	hypothetical protein
GI6	558715	640718	82004	627969	628376	crossover junction endodeoxyribonuclease RuvA
GI6	558715	640718	82004	628373	628612	hypothetical protein
GI6	558715	640718	82004	628680	628964	hypothetical protein
GI6	558715	640718	82004	629355	630014	repressor protein
GI6	558715	640718	82004	630052	630567	hypothetical protein
GI6	558715	640718	82004	630630	630917	hypothetical protein
GI6	558715	640718	82004	630920	631333	hypothetical protein
GI6	558715	640718	82004	631516	631854	hypothetical protein
GI6	558715	640718	82004	632006	632197	hypothetical protein
GI6	558715	640718	82004	632191	632592	hypothetical protein
GI6	558715	640718	82004	632589	633269	hypothetical protein
GI6	558715	640718	82004	633266	633763	hypothetical protein
GI6	558715	640718	82004	634493	635155	hypothetical protein
GI6	558715	640718	82004	635152	636765	DNA or RNA helicase of superfamily II
GI6	558715	640718	82004	636884	637234	hypothetical protein
GI6	558715	640718	82004	637221	637718	transcriptional regulator
GI6	558715	640718	82004	637829	638371	hypothetical protein
GI6	558715	640718	82004	638355	638591	hypothetical protein
GI6	558715	640718	82004	638588	638794	hypothetical protein
GI6	558715	640718	82004	638791	639021	hypothetical protein
GI6	558715	640718	82004	639018	639434	hypothetical protein
GI6	558715	640718	82004	639660	640682	integrase
GI7	589310	638794	49485	589310	590479	tetrahydromethanopterin S-methyltransferase subunit A
GI7	589310	638794	49485	590476	590883	transcriptional regulator
GI7	589310	638794	49485	591331	591708	hypothetical protein
GI7	589310	638794	49485	591686	591886	hypothetical protein
GI7	589310	638794	49485	592154	595345	chemiosmotic efflux protein CzcA
GI7	589310	638794	49485	595349	596269	hypothetical protein
GI7	589310	638794	49485	596328	597674	chemiosmotic efflux system C protein C
GI7	589310	638794	49485	597848	598255	hypothetical protein
GI7	589310	638794	49485	598417	598626	hypothetical protein
GI7	589310	638794	49485	598617	598847	hypothetical protein
GI7	589310	638794	49485	598848	599762	integrase
GI7	589310	638794	49485	600145	600483	hypothetical protein
GI7	589310	638794	49485	600703	600918	hypothetical protein
GI7	589310	638794	49485	600915	601214	hypothetical protein
GI7	589310	638794	49485	601216	601578	hypothetical protein
GI7	589310	638794	49485	601575	601802	hypothetical protein
GI7	589310	638794	49485	601894	602409	secretion activating protein
GI7	589310	638794	49485	602421	602630	hypothetical protein
GI7	589310	638794	49485	602630	603115	hypothetical protein
GI7	589310	638794	49485	603138	603407	hypothetical protein
GI7	589310	638794	49485	603475	604005	hypothetical protein
GI7	589310	638794	49485	604022	605071	hypothetical protein
GI7	589310	638794	49485	605080	605745	hypothetical protein
GI7	589310	638794	49485	605749	606837	baseplate J family protein
GI7	589310	638794	49485	606834	607211	hypothetical protein
GI7	589310	638794	49485	607211	607888	hypothetical protein
GI7	589310	638794	49485	607891	609069	hypothetical protein
GI7	589310	638794	49485	609066	610310	hypothetical protein
GI7	589310	638794	49485	610314	612077	hypothetical protein
GI7	589310	638794	49485	612061	612510	hypothetical protein
GI7	589310	638794	49485	612659	613030	hypothetical protein
GI7	589310	638794	49485	613034	613465	hypothetical protein
GI7	589310	638794	49485	613482	615002	hypothetical protein
GI7	589310	638794	49485	615062	615874	hypothetical protein
GI7	589310	638794	49485	615883	616539	hypothetical protein
GI7	589310	638794	49485	616544	616750	hypothetical protein
GI7	589310	638794	49485	616752	617201	hypothetical protein
GI7	589310	638794	49485	617201	617641	hypothetical protein
GI7	589310	638794	49485	617631	617966	hypothetical protein
GI7	589310	638794	49485	617979	619448	hypothetical protein
GI7	589310	638794	49485	619582	620121	hypothetical protein
GI7	589310	638794	49485	620066	621550	hypothetical protein
GI7	589310	638794	49485	621690	622184	hypothetical protein
GI7	589310	638794	49485	622181	622468	hypothetical protein
GI7	589310	638794	49485	622470	623726	hypothetical protein
GI7	589310	638794	49485	623710	624252	phage terminase small subuni
GI7	589310	638794	49485	624249	624458	hypothetical protein
GI7	589310	638794	49485	624469	625773	deoxyribonuclease
GI7	589310	638794	49485	626026	627972	hypothetical protein
GI7	589310	638794	49485	627969	628376	crossover junction endodeoxyribonuclease RuvA
GI7	589310	638794	49485	628373	628612	hypothetical protein
GI7	589310	638794	49485	628680	628964	hypothetical protein
GI7	589310	638794	49485	629355	630014	repressor protein
GI7	589310	638794	49485	630052	630567	hypothetical protein
GI7	589310	638794	49485	630630	630917	hypothetical protein
GI7	589310	638794	49485	630920	631333	hypothetical protein
GI7	589310	638794	49485	631516	631854	hypothetical protein
GI7	589310	638794	49485	632006	632197	hypothetical protein
GI7	589310	638794	49485	632191	632592	hypothetical protein
GI7	589310	638794	49485	632589	633269	hypothetical protein
GI7	589310	638794	49485	633266	633763	hypothetical protein
GI7	589310	638794	49485	634493	635155	hypothetical protein
GI7	589310	638794	49485	635152	636765	DNA or RNA helicase of superfamily II
GI7	589310	638794	49485	636884	637234	hypothetical protein
GI7	589310	638794	49485	637221	637718	transcriptional regulator
GI7	589310	638794	49485	637829	638371	hypothetical protein
GI7	589310	638794	49485	638355	638591	hypothetical protein
GI7	589310	638794	49485	638588	638794	hypothetical protein
GI7	589310	638794	49485	638791	639021	hypothetical protein
GI8	808953	819752	10800	809421	810038	terminase small subunit
GI8	808953	819752	10800	810066	810428	hypothetical protein
GI8	808953	819752	10800	811091	811399	hypothetical protein
GI8	808953	819752	10800	811371	812621	hypothetical protein
GI8	808953	819752	10800	812618	813007	hypothetical protein
GI8	808953	819752	10800	813420	814322	hypothetical protein
GI8	808953	819752	10800	814417	814803	hypothetical protein
GI8	808953	819752	10800	814804	816804	hypothetical protein
GI8	808953	819752	10800	816804	817004	helix-turn-helix domain-containing protein
GI8	808953	819752	10800	817071	817820	hypothetical protein
GI8	808953	819752	10800	817908	818120	addiction module toxin, HicA family
GI8	808953	819752	10800	818117	818320	hypothetical protein
GI8	808953	819752	10800	818334	819518	phage integrase family protein
GI9	1568153	1574174	6022	1568153	1569370	transposase
GI9	1568153	1574174	6022	1569424	1570830	hypothetical protein
GI9	1568153	1574174	6022	1570976	1571434	hypothetical protein
GI9	1568153	1574174	6022	1571457	1571912	hypothetical protein
GI9	1568153	1574174	6022	1572005	1572244	hypothetical protein
GI9	1568153	1574174	6022	1572258	1572461	hypothetical protein
GI9	1568153	1574174	6022	1572806	1573639	signal transduction protein
GI9	1568153	1574174	6022	1573848	1574174	hypothetical protein
GI10	1581745	1620058	38314	1581893	1582969	integrase
GI10	1581745	1620058	38314	1583182	1583757	hypothetical protein
GI10	1581745	1620058	38314	1583748	1584689	hypothetical protein
GI10	1581745	1620058	38314	1584862	1585263	hypothetical protein
GI10	1581745	1620058	38314	1585721	1586452	IstB-like ATP-binding protein
GI10	1581745	1620058	38314	1586446	1587489	transposase
GI10	1581745	1620058	38314	1587627	1589237	transposase
GI10	1581745	1620058	38314	1589228	1589971	IstB protein
GI10	1581745	1620058	38314	1589926	1590561	transposase
GI10	1581745	1620058	38314	1591108	1591392	IstB domain-containing protein ATP-binding protein
GI10	1581745	1620058	38314	1591408	1591965	transposase
GI10	1581745	1620058	38314	1592123	1592923	hypothetical protein
GI10	1581745	1620058	38314	1593108	1593821	TIGR04255 family protein
GI10	1581745	1620058	38314	1593818	1594390	hypothetical protein
GI10	1581745	1620058	38314	1594369	1594803	hypothetical protein
GI10	1581745	1620058	38314	1594974	1595219	hypothetical protein
GI10	1581745	1620058	38314	1595216	1595431	hypothetical protein
GI10	1581745	1620058	38314	1595656	1598562	conjugal transfer protein TraA
GI10	1581745	1620058	38314	1598562	1600661	conjugal transfer protein TraD
GI10	1581745	1620058	38314	1600658	1601125	hypothetical protein
GI10	1581745	1620058	38314	1601110	1601769	hypothetical protein
GI10	1581745	1620058	38314	1601769	1602494	mobilization protein, MobD
GI10	1581745	1620058	38314	1602507	1602884	hypothetical protein
GI10	1581745	1620058	38314	1603213	1603689	hypothetical protein
GI10	1581745	1620058	38314	1603686	1603910	hypothetical protein
GI10	1581745	1620058	38314	1604020	1604436	hypothetical protein
GI10	1581745	1620058	38314	1604436	1606667	hypothetical protein
GI10	1581745	1620058	38314	1606654	1606941	hypothetical protein
GI10	1581745	1620058	38314	1607045	1607803	transcriptional regulator
GI10	1581745	1620058	38314	1607873	1608196	hypothetical protein
GI10	1581745	1620058	38314	1608190	1608378	hypothetical protein
GI10	1581745	1620058	38314	1608505	1609413	hypothetical protein
GI10	1581745	1620058	38314	1609494	1614245	damage-inducible protein
GI10	1581745	1620058	38314	1614414	1614632	hypothetical protein
GI10	1581745	1620058	38314	1614820	1615272	hypothetical protein
GI10	1581745	1620058	38314	1615275	1616459	UBA/THIF-type NAD/FAD-binding fold protein
GI10	1581745	1620058	38314	1616434	1616754	hypothetical protein
GI10	1581745	1620058	38314	1617082	1617420	hypothetical protein
GI10	1581745	1620058	38314	1617642	1617854	ribbon-helix-helix protein, CopG family
GI10	1581745	1620058	38314	1617851	1618501	hypothetical protein
GI10	1581745	1620058	38314	1618498	1618968	hypothetical protein
GI10	1581745	1620058	38314	1618965	1619888	hypothetical protein
GI11	1593818	1623273	29456	1593108	1593821	TIGR04255 family protein
GI11	1593818	1623273	29456	1593818	1594390	hypothetical protein
GI11	1593818	1623273	29456	1594369	1594803	hypothetical protein
GI11	1593818	1623273	29456	1594974	1595219	hypothetical protein
GI11	1593818	1623273	29456	1595216	1595431	hypothetical protein
GI11	1593818	1623273	29456	1595656	1598562	conjugal transfer protein TraA
GI11	1593818	1623273	29456	1598562	1600661	conjugal transfer protein TraD
GI11	1593818	1623273	29456	1600658	1601125	hypothetical protein
GI11	1593818	1623273	29456	1601110	1601769	hypothetical protein
GI11	1593818	1623273	29456	1601769	1602494	mobilization protein, MobD
GI11	1593818	1623273	29456	1602507	1602884	hypothetical protein
GI11	1593818	1623273	29456	1603213	1603689	hypothetical protein
GI11	1593818	1623273	29456	1603686	1603910	hypothetical protein
GI11	1593818	1623273	29456	1604020	1604436	hypothetical protein
GI11	1593818	1623273	29456	1604436	1606667	hypothetical protein
GI11	1593818	1623273	29456	1606654	1606941	hypothetical protein
GI11	1593818	1623273	29456	1607045	1607803	transcriptional regulator
GI11	1593818	1623273	29456	1607873	1608196	hypothetical protein
GI11	1593818	1623273	29456	1608190	1608378	hypothetical protein
GI11	1593818	1623273	29456	1608505	1609413	hypothetical protein
GI11	1593818	1623273	29456	1609494	1614245	damage-inducible protein
GI11	1593818	1623273	29456	1614414	1614632	hypothetical protein
GI11	1593818	1623273	29456	1614820	1615272	hypothetical protein
GI11	1593818	1623273	29456	1615275	1616459	UBA/THIF-type NAD/FAD-binding fold protein
GI11	1593818	1623273	29456	1616434	1616754	hypothetical protein
GI11	1593818	1623273	29456	1617082	1617420	hypothetical protein
GI11	1593818	1623273	29456	1617642	1617854	ribbon-helix-helix protein, CopG family
GI11	1593818	1623273	29456	1617851	1618501	hypothetical protein
GI11	1593818	1623273	29456	1618498	1618968	hypothetical protein
GI11	1593818	1623273	29456	1618965	1619888	hypothetical protein
GI11	1593818	1623273	29456	1619885	1620082	hypothetical protein
GI11	1593818	1623273	29456	1620200	1621246	integrase
GI11	1593818	1623273	29456	1621323	1622543	transposase
GI11	1593818	1623273	29456	1622686	1622946	hypothetical protein
GI11	1593818	1623273	29456	1623058	1623273	hypothetical protein
GI12	1642136	1664350	22215	1642136	1643587	hypothetical protein
GI12	1642136	1664350	22215	1643535	1643825	hypothetical protein
GI12	1642136	1664350	22215	1643843	1644031	hypothetical protein
GI12	1642136	1664350	22215	1644021	1644200	hypothetical protein
GI12	1642136	1664350	22215	1644199	1644855	polyisoprenoid-binding protein
GI12	1642136	1664350	22215	1644827	1645009	hypothetical protein
GI12	1642136	1664350	22215	1645009	1645890	hypothetical protein
GI12	1642136	1664350	22215	1646022	1646291	XRE family transcriptional regulator
GI12	1642136	1664350	22215	1646379	1648439	hydrogenase 4 subunit B
GI12	1642136	1664350	22215	1648465	1649409	formate hydrogenlyase
GI12	1642136	1664350	22215	1649410	1650072	hydrogenase 4 membrane component
GI12	1642136	1664350	22215	1650077	1651534	NADH dehydrogenase (quinone)
GI12	1642136	1664350	22215	1651602	1653101	NADH ubiquinone dehydrogenase
GI12	1642136	1664350	22215	1653120	1653629	NADH ubiquinone dehydrogenase
GI12	1642136	1664350	22215	1653653	1654939	hypothetical protein
GI12	1642136	1664350	22215	1654970	1655248	hypothetical protein
GI12	1642136	1664350	22215	1655338	1656087	cyclic nucleotide-binding protein
GI12	1642136	1664350	22215	1656124	1656456	hypothetical protein
GI12	1642136	1664350	22215	1656683	1656988	hypothetical protein
GI12	1642136	1664350	22215	1657079	1657312	hypothetical protein
GI12	1642136	1664350	22215	1657596	1657838	hypothetical protein
GI12	1642136	1664350	22215	1657885	1658163	hypothetical protein
GI12	1642136	1664350	22215	1658209	1658442	hypothetical protein
GI12	1642136	1664350	22215	1658441	1658686	prevent-host-death protein
GI12	1642136	1664350	22215	1658670	1659071	PIN domain-containing protein
GI12	1642136	1664350	22215	1659298	1659814	hypothetical protein
GI12	1642136	1664350	22215	1660193	1660447	plasmid stability protein
GI12	1642136	1664350	22215	1660444	1660866	nucleic acid-binding protein
GI12	1642136	1664350	22215	1660889	1661050	XRE family transcriptional regulator
GI12	1642136	1664350	22215	1661153	1661497	transposase
GI12	1642136	1664350	22215	1661746	1661940	hypothetical protein
GI12	1642136	1664350	22215	1662434	1663000	hypothetical protein
GI12	1642136	1664350	22215	1663226	1663540	hypothetical protein
GI12	1642136	1664350	22215	1663586	1664350	response regulator/putative metal-dependent phosphohydrolase
GI13	1675934	1703491	27558	1675934	1676677	D-glycero-D-manno-heptose 1-phosphate guanosyltransferase
GI13	1675934	1703491	27558	1676674	1677612	NAD-dependent epimerase
GI13	1675934	1703491	27558	1678100	1678822	hypothetical protein
GI13	1675934	1703491	27558	1678819	1679532	histidinol phosphate phosphatase
GI13	1675934	1703491	27558	1679529	1681304	hypothetical protein
GI13	1675934	1703491	27558	1681373	1681741	transposase
GI13	1675934	1703491	27558	1681748	1681957	hypothetical protein
GI13	1675934	1703491	27558	1682011	1682253	transposase
GI13	1675934	1703491	27558	1682427	1683117	hypothetical protein
GI13	1675934	1703491	27558	1683108	1683896	IstB-like ATP-binding protein
GI13	1675934	1703491	27558	1683893	1684252	hypothetical protein
GI13	1675934	1703491	27558	1684552	1685061	hypothetical protein
GI13	1675934	1703491	27558	1685120	1685758	hypothetical protein
GI13	1675934	1703491	27558	1685892	1686092	hypothetical protein
GI13	1675934	1703491	27558	1686340	1686693	hypothetical protein
GI13	1675934	1703491	27558	1686718	1687098	hypothetical protein
GI13	1675934	1703491	27558	1687095	1690298	hypothetical protein
GI13	1675934	1703491	27558	1690295	1691551	secretion protein HlyD
GI13	1675934	1703491	27558	1691541	1692953	outer membrane efflux protein
GI13	1675934	1703491	27558	1693014	1693373	hypothetical protein
GI13	1675934	1703491	27558	1693753	1694910	hypothetical protein
GI13	1675934	1703491	27558	1696098	1696316	hypothetical protein
GI13	1675934	1703491	27558	1696549	1697976	group 1 glycosyl transferase
GI13	1675934	1703491	27558	1697973	1699157	hypothetical protein
GI13	1675934	1703491	27558	1699242	1699517	hypothetical protein
GI13	1675934	1703491	27558	1699537	1700946	glycosyl transferase
GI13	1675934	1703491	27558	1701114	1701341	hypothetical protein
GI13	1675934	1703491	27558	1701737	1702677	transposase
GI13	1675934	1703491	27558	1702778	1703491	polysaccharide/polyol phosphate ABC transporter ATPase
GI14	2320750	2344554	23805	2320889	2321521	hypothetical protein
GI14	2320750	2344554	23805	2321701	2321991	hypothetical protein
GI14	2320750	2344554	23805	2322311	2324536	virulence-associated protein E
GI14	2320750	2344554	23805	2324536	2324985	hypothetical protein
GI14	2320750	2344554	23805	2325051	2325266	hypothetical protein
GI14	2320750	2344554	23805	2325467	2325895	hypothetical protein
GI14	2320750	2344554	23805	2325892	2326611	hypothetical protein
GI14	2320750	2344554	23805	2326598	2327227	hypothetical protein
GI14	2320750	2344554	23805	2327240	2327530	protein MobB
GI14	2320750	2344554	23805	2327508	2329250	relaxase/primase-like fusion protein
GI14	2320750	2344554	23805	2329396	2329755	hypothetical protein
GI14	2320750	2344554	23805	2330390	2331169	IstB protein
GI14	2320750	2344554	23805	2331166	2332698	transposase
GI14	2320750	2344554	23805	2332980	2333846	hypothetical protein
GI14	2320750	2344554	23805	2333970	2334461	hypothetical protein
GI14	2320750	2344554	23805	2334784	2336055	hypothetical protein
GI14	2320750	2344554	23805	2336326	2337408	phosphate ABC transporter substrate-binding protein PstS
GI14	2320750	2344554	23805	2337443	2338729	arsenite membrane pump,arsB
GI14	2320750	2344554	23805	2338731	2339204	CBS domain-containing protein
GI14	2320750	2344554	23805	2339215	2340978	arsenical pump-driving ATPase
GI14	2320750	2344554	23805	2341029	2341400	arsenical resistance operon trans-acting repressor ArsD
GI14	2320750	2344554	23805	2341476	2341955	arsenate reductase
GI14	2320750	2344554	23805	2341952	2342335	transcriptional regulator
GI14	2320750	2344554	23805	2343013	2343243	hypothetical protein
GI14	2320750	2344554	23805	2343412	2344389	integrase
GI15	2333970	2344389	10420	2333970	2334461	hypothetical protein
GI15	2333970	2344389	10420	2334784	2336055	hypothetical protein
GI15	2333970	2344389	10420	2336326	2337408	phosphate ABC transporter substrate-binding protein PstS
GI15	2333970	2344389	10420	2337443	2338729	arsenite membrane pump,arsB
GI15	2333970	2344389	10420	2338731	2339204	CBS domain-containing protein
GI15	2333970	2344389	10420	2339215	2340978	arsenical pump-driving ATPase
GI15	2333970	2344389	10420	2341029	2341400	arsenical resistance operon trans-acting repressor ArsD
GI15	2333970	2344389	10420	2341476	2341955	arsenate reductase
GI15	2333970	2344389	10420	2341952	2342335	transcriptional regulator
GI15	2333970	2344389	10420	2343013	2343243	hypothetical protein
GI15	2333970	2344389	10420	2343412	2344389	integrase
YSK
GI1	267648	274731	7084	265346	267667	DNA topoisomerase I
GI1	267648	274731	7084	267648	269045	glucose-inhibited division protein A
GI1	267648	274731	7084	269035	270003	phage integrase family protein
GI1	267648	274731	7084	269987	270583	ATP-dependent protease subunit HslV
GI1	267648	274731	7084	270580	271901	ATP-dependent protease ATP-binding subunit HslU
GI1	267648	274731	7084	271955	272827	acetylglutamate kinase
GI1	267648	274731	7084	272814	273284	hypothetical protein
GI1	267648	274731	7084	273308	273751	deoxyuridine 5'-triphosphate nucleotidohydrolase
GI1	267648	274731	7084	273886	274731	rRNA (cytidine-2'-O-)-methyltransferase
GI1	267648	274731	7084	274724	275584	pantoate--beta-alanine ligase
GI2	438615	450003	11389	438615	439880	hypothetical protein
GI2	438615	450003	11389	440209	442326	hypothetical protein
GI2	438615	450003	11389	442421	442636	hypothetical protein
GI2	438615	450003	11389	442775	443842	integrase
GI2	438615	450003	11389	443850	444185	hypothetical protein
GI2	438615	450003	11389	444553	444993	hypothetical protein
GI2	438615	450003	11389	445026	445466	transposase
GI2	438615	450003	11389	445665	446567	hypothetical protein
GI2	438615	450003	11389	446578	446901	hypothetical protein
GI2	438615	450003	11389	447040	447279	hypothetical protein
GI2	438615	450003	11389	448524	448721	hypothetical protein
GI2	438615	450003	11389	449287	450003	hypothetical protein
GI3	1346502	1364660	18159	1346502	1347920	class II fumarate hydratase
GI3	1346502	1364660	18159	1348071	1348265	integrase
GI3	1346502	1364660	18159	1348395	1349498	hypothetical protein
GI3	1346502	1364660	18159	1349501	1350517	hypothetical protein
GI3	1346502	1364660	18159	1350517	1352034	cobyric acid synthase CobQ
GI3	1346502	1364660	18159	1352121	1352603	hypothetical protein
GI3	1346502	1364660	18159	1353190	1354179	copper oxidase
GI3	1346502	1364660	18159	1354272	1354949	cytochrome c
GI3	1346502	1364660	18159	1354946	1355317	cytochrome C class I
GI3	1346502	1364660	18159	1355487	1356440	nitrite reductase
GI3	1346502	1364660	18159	1356619	1357176	DNA repair protein
GI3	1346502	1364660	18159	1357299	1358483	NADH dehydrogenase
GI3	1346502	1364660	18159	1359138	1359893	oxidoreductase FAD/NAD(P)-binding protein
GI3	1346502	1364660	18159	1360547	1360852	hypothetical protein
GI3	1346502	1364660	18159	1360939	1361823	hypothetical protein
GI3	1346502	1364660	18159	1361958	1362188	hypothetical protein
GI3	1346502	1364660	18159	1362460	1363140	hypothetical protein
GI3	1346502	1364660	18159	1363256	1363900	hypothetical protein
GI3	1346502	1364660	18159	1364196	1364660	hypothetical protein
GI4	1692617	1714857	22241	1692617	1693663	feruloyl esterase
GI4	1692617	1714857	22241	1693872	1694060	hypothetical protein
GI4	1692617	1714857	22241	1694137	1694757	hypothetical protein
GI4	1692617	1714857	22241	1694973	1695257	hypothetical protein
GI4	1692617	1714857	22241	1695533	1696408	hypothetical protein
GI4	1692617	1714857	22241	1697395	1698087	hypothetical protein
GI4	1692617	1714857	22241	1698663	1698842	transposase
GI4	1692617	1714857	22241	1699415	1699951	hypothetical protein
GI4	1692617	1714857	22241	1700165	1700350	hypothetical protein
GI4	1692617	1714857	22241	1700443	1700787	hypothetical protein
GI4	1692617	1714857	22241	1701025	1701309	hypothetical protein
GI4	1692617	1714857	22241	1701543	1703318	hypothetical protein
GI4	1692617	1714857	22241	1703450	1703737	hypothetical protein
GI4	1692617	1714857	22241	1703940	1704781	hypothetical protein
GI4	1692617	1714857	22241	1704795	1705049	hypothetical protein
GI4	1692617	1714857	22241	1705185	1705484	hypothetical protein
GI4	1692617	1714857	22241	1705630	1705830	hypothetical protein
GI4	1692617	1714857	22241	1706212	1706433	hypothetical protein
GI4	1692617	1714857	22241	1707442	1708869	hypothetical protein
GI4	1692617	1714857	22241	1709004	1710171	transposase
GI4	1692617	1714857	22241	1710315	1710659	hypothetical protein
GI4	1692617	1714857	22241	1710999	1711730	ATPase AAA
GI4	1692617	1714857	22241	1711724	1712011	hypothetical protein
GI4	1692617	1714857	22241	1712270	1713349	hypothetical protein
GI4	1692617	1714857	22241	1713811	1714857	feruloyl esterase
Sp-Cl
GI1	Contig44: 6530	Contig44: 27638	21109	Contig44: 6530	Contig44: 9679	hypothetical protein
GI1	Contig44: 6530	Contig44: 27638	21109	Contig44: 9729	Contig44: 10121	hypothetical protein
GI1	Contig44: 6530	Contig44: 27638	21109	Contig44: 10163	Contig44: 10690	hypothetical protein
GI1	Contig44: 6530	Contig44: 27638	21109	Contig44: 11067	Contig44:11273	hypothetical protein
GI1	Contig44: 6530	Contig44: 27638	21109	Contig44: 11399	Contig44: 11767	hypothetical protein
GI1	Contig44: 6530	Contig44: 27638	21109	Contig44: 12277	Contig44: 12534	cation diffusion facilitator family transporter
GI1	Contig44: 6530	Contig44: 27638	21109	Contig44: 12605	Contig44: 13513	hypothetical protein
GI1	Contig44: 6530	Contig44: 27638	21109	Contig44: 13658	Contig44: 14062	hypothetical protein
GI1	Contig44: 6530	Contig44: 27638	21109	Contig44: 14199	Contig44: 14561	hypothetical protein
GI1	Contig44: 6530	Contig44: 27638	21109	Contig44: 14530	Contig44: 14859	hypothetical protein
GI1	Contig44: 6530	Contig44: 27638	21109	Contig44: 14858	Contig44: 16093	hypothetical protein
GI1	Contig44: 6530	Contig44: 27638	21109	Contig44: 16086	Contig44: 17069	transporter
GI1	Contig44: 6530	Contig44: 27638	21109	Contig44: 17073	Contig44: 20261	hypothetical protein
GI1	Contig44: 6530	Contig44: 27638	21109	Contig44: 20212	Contig44: 20688	hypothetical protein
GI1	Contig44: 6530	Contig44: 27638	21109	Contig44: 20663	Contig44: 20902	hypothetical protein
GI1	Contig44: 6530	Contig44: 27638	21109	Contig44: 20966	Contig44: 21166	copper-translocating P-type ATPase
GI1	Contig44: 6530	Contig44: 27638	21109	Contig44: 21190	Contig44: 23613	hypothetical protein
GI1	Contig44: 6530	Contig44: 27638	21109	Contig44: 24505	Contig44: 25479	integrase
GI1	Contig44: 6530	Contig44: 27638	21109	Contig44: 26291	Contig44: 27109	hypothetical protein
GI1	Contig44: 6530	Contig44: 27638	21109	Contig44: 27144	Contig44: 27638	tRNA-specific adenosine deaminase
GI2	Contig40: 17739	Contig40: 27990	10252	Contig40: 17739	Contig40: 18599	pantoate--beta-alanine ligase
GI2	Contig40: 17739	Contig40: 27990	10252	Contig40: 18592	Contig40: 19437	rRNA (cytidine-2'-O-)-methyltransferase
GI2	Contig40: 17739	Contig40: 27990	10252	Contig40: 19412	Contig40: 19615	hypothetical protein
GI2	Contig40: 17739	Contig40: 27990	10252	Contig40: 19572	Contig40: 20015	deoxyuridine 5'-triphosphate nucleotidohydrolase
GI2	Contig40: 17739	Contig40: 27990	10252	Contig40: 20039	Contig40: 20509	hypothetical protein
GI2	Contig40: 17739	Contig40: 27990	10252	Contig40: 20496	Contig40: 21368	acetylglutamate kinase
GI2	Contig40: 17739	Contig40: 27990	10252	Contig40: 21422	Contig40: 22756	ATP-dependent protease ATP-binding subunit HslU
GI2	Contig40: 17739	Contig40: 27990	10252	Contig40: 22753	Contig40: 23349	ATP-dependent protease subunit HslV
GI2	Contig40: 17739	Contig40: 27990	10252	Contig40: 23333	Contig40: 24301	phage integrase family protein
GI2	Contig40: 17739	Contig40: 27990	10252	Contig40: 24291	Contig40: 25688	glucose-inhibited division protein A
GI2	Contig40: 17739	Contig40: 27990	10252	Contig40: 25669	Contig40: 27990	DNA topoisomerase I
GI3	Contig69: 106	Contig69: 6695	6590	Contig69: 106	Contig69: 693	hypothetical protein
GI3	Contig69: 106	Contig69: 6695	6590	Contig69: 690	Contig69: 1241	hypothetical protein
GI3	Contig69: 106	Contig69: 6695	6590	Contig69: 1514	Contig69: 1774	IS110 family transposase
GI3	Contig69: 106	Contig69: 6695	6590	Contig69: 2101	Contig69: 3159	hypothetical protein
GI3	Contig69: 106	Contig69: 6695	6590	Contig69: 3752	Contig69: 4231	transposase
GI3	Contig69: 106	Contig69: 6695	6590	Contig69: 5634	Contig69: 6695	lipopolysaccharide heptosyltransferase II
*GIs were predicted by at least one method. Addtionally, some putative GIs dispersed in at least two contigs were not discussed here.
